# Supplementary material for: A photoluminescent chiral lead-free hybrid ferroelastic semiconductor with switchable second-harmonic generation
Source: Royal Society of Chemistry journal article supplement (doi:10.1039/d2cc06575d), 2023-01-01
Supplement: d2cc06575d1.pdf [file d2cc06575d1.pdf]

## Electronic Supplementary Information

### A Photoluminescent Chiral Lead-free Hybrid Ferroelastic Semiconductor with Switchable Second-Harmonic Generation

Qin Liu,<sup>‡</sup> Hang Peng,<sup>‡</sup> Jun-Chao Qi,<sup>‡</sup> Yan-Zi Lu, Shu-Jing Yang and Wei-Qiang Liao\*

Ordered Matter Science Research Center, Nanchang University, Nanchang 330031, People's Republic of China.

<sup>‡</sup> These authors contributed equally to this work.

E-mail: liaowq@ncu.edu.cn

#### Experimental details

**Sample preparation.** All reagents and solvents in this experiment were of reagent grade and used without further purification. *R*-3-hydroxyl piperidine and antimony chloride were dissolved in concentrated hydrochloric acid by a stoichiometric ratio of 2:1. Colorless crystals of  $[R\text{-HP}]_2\text{SbCl}_5$  were finally obtained after a slow evaporation of the solvent at 313 K.

**Thin film preparation.** For the preparation of a thin film sample of  $[R\text{-HP}]_2\text{SbCl}_5$ , the precursor solution was prepared by dissolving 15 mg of the as-grown crystals of  $[R\text{-HP}]_2\text{SbCl}_5$  in 300  $\mu\text{L}$  concentrated HCl aqueous solution. Spreading 20  $\mu\text{L}$  of the precursor solution on the clean ITO (indium tin oxide) glass substrate, The thin films were prepared by heat treatment and then annealing the substrate at 343 K.

**Characterization methods.** Single-crystal X-ray diffraction data were performed on a Rigaku Oxford Diffraction 2019 diffractometer in the scan mode with Mo-K $\alpha$  radiation ( $\lambda = 0.71073$ ). We used the CrystalClear software package to process the data. We utilized the Olex2 software to solve the structure by direct methods and refined the structure by the full-matrix method based on  $F^2$  by means of the SHELXLTL software package. Non-H atoms were refined anisotropically. All H atoms were generated geometrically. Differential scanning calorimetry (DSC) measurements were carried out on a NETZSCH DSC 214 instrument under a dinitrogen atmosphere in aluminum crucibles. The dielectric

measurements were carried on a TH2828A impedance analyzer. Thermogravimetric analysis (TGA) were carried out on a PerkinElmer TGA 8000 instrument by heating crystalline samples under a nitrogen atmosphere. We used the Rigaku D/MAX 2000 PC X-ray diffraction instrument in the  $2\theta$  between  $7.5^\circ$  and  $40^\circ$  with a step size of  $0.02^\circ$  to record PXRD patterns. The SHG measurements were carried on an INSTEC Instrument (pulsed Nd: YAG laser with a wavelength of 1081 nm, 1.6 MW peak power, 5 ns pulse duration). The numerical values of the nonlinear optical coefficients for SHG were determined by comparison with a KDP reference. Band structure and Partial Density of states (PDOS) were performed with Vienna Ab initio Simulation Package (VASP)<sup>1-2</sup> using the Perdew-Burke-Ernzerhof (PBE) functional<sup>3</sup> with the generalized gradient approximation (GGA). Electron-ion interactions were described using the projector augmented wave (PAW) method. The initial model was based on the single-crystal structure of 293 K and optimized before calculation with cell parameters of  $a = 10.06 \text{ \AA}$ ,  $b = 9.99 \text{ \AA}$ ,  $c = 18.16 \text{ \AA}$ , and  $\alpha = \beta = \gamma = 90^\circ$ . The Monkhorst-Pack grid was  $3 \times 3 \times 2$  for works, and the plane-wave cutoff energy was 500 eV. The energy and force tolerances for optimization were  $10^{-5}$  eV and  $0.01 \text{ eV/\AA}$ , respectively. All calculations were performed using the Grimme's DFT-D3 method to deal with Van der Waals effects.

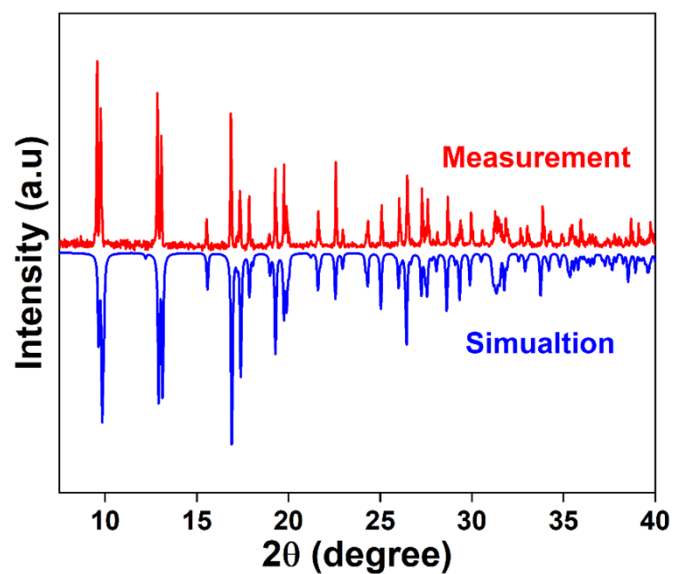

**Fig. S1.** Experimental PXRD patterns and simulated ones from crystal structure of  $[R\text{-HP}]_2\text{SnCl}_5$  at room temperature.

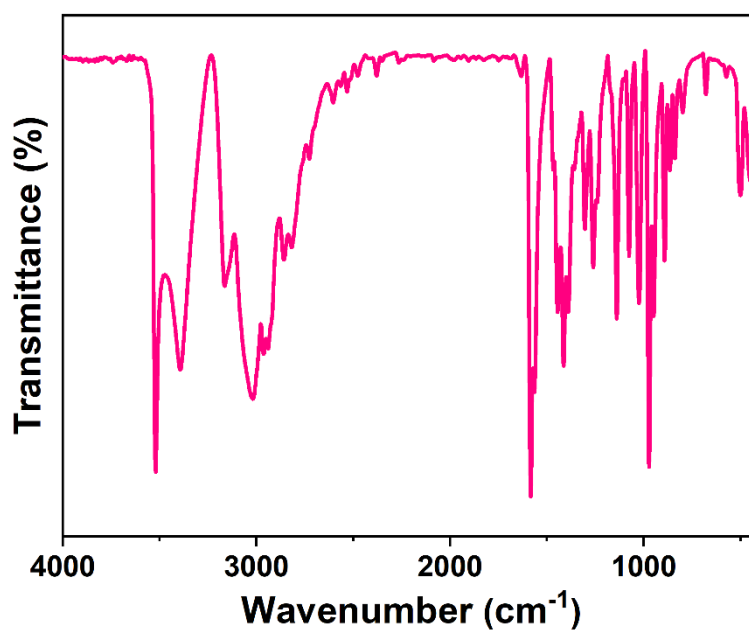

**Fig. S2.** Infrared (IR) spectrum of  $[R\text{-HP}]_2\text{SbCl}_5$  recorded on a Bruker NVENIO spectrometer at room temperature.

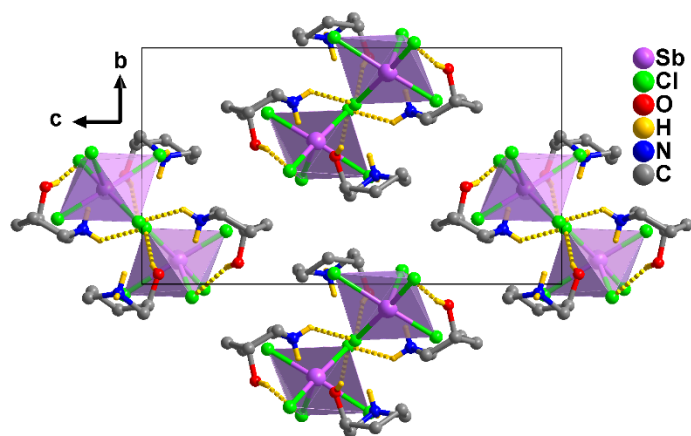

**Fig. S3.** Packing views of the structures of  $[R-HP]_2SbCl_5$ . The yellow dashed line denotes hydrogen bonds.

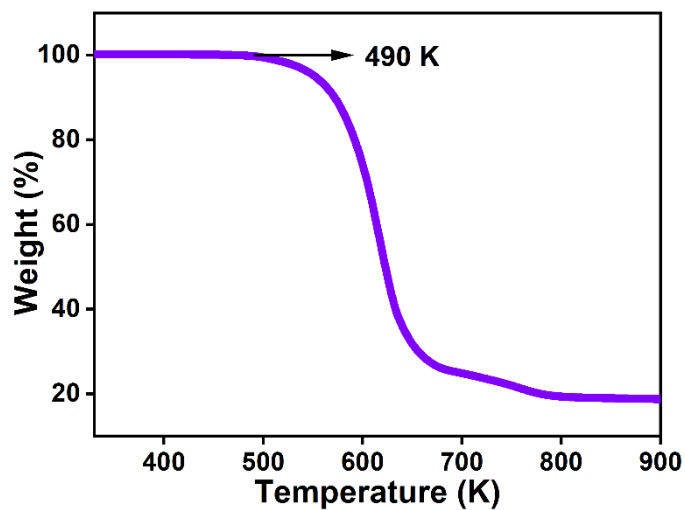

**Fig. S4.** TGA curve of  $[R-HP]_2SnCl_5$  in the temperature range of 303 K-900 K, showing thermal stability up to about 490 K.

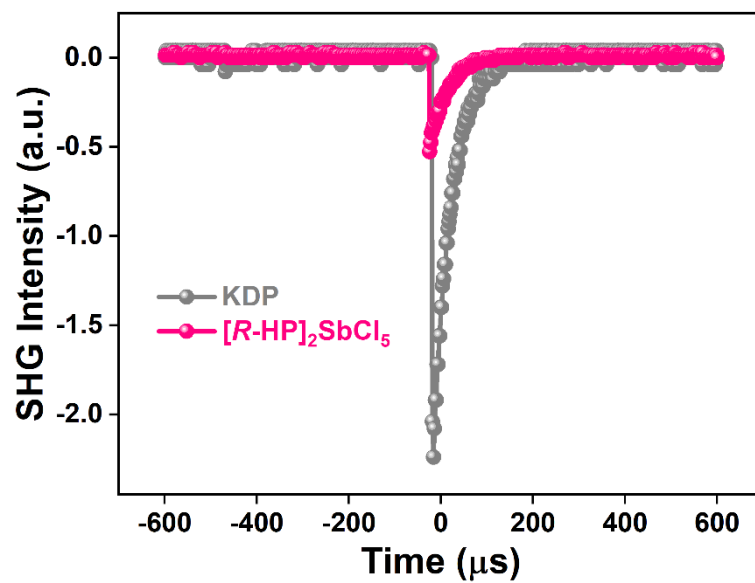

**Fig. S5.** SHG signals of KDP and  $[R\text{-HP}]_2\text{SbCl}_5$  at room temperature.

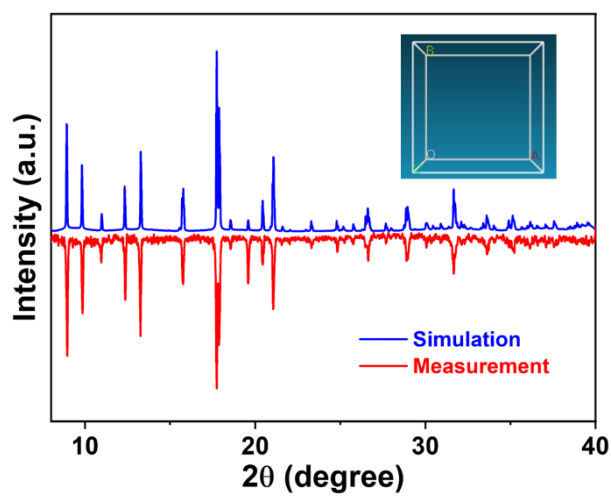

**Fig. S6.** Pawley refinement of PXRD data of  $[R\text{-HP}]_2\text{SbCl}_5$  collected at 363 K with tetragonal crystal system.

**Table S1.** Crystal data and structure refinement details for  $[R\text{-HP}]_2\text{SbCl}_5$  at 293 K.

| Compound                    | $[R\text{-HP}]_2\text{SbCl}_5$                                       |
|-----------------------------|----------------------------------------------------------------------|
| Temperature                 | 293 K                                                                |
| Formula                     | $\text{C}_{10}\text{H}_{24}\text{Cl}_5\text{N}_2\text{O}_2\text{Sb}$ |
| Formula weight              | 503.31                                                               |
| Crystal system              | orthorhombic                                                         |
| Space group                 | $P2_12_12_1$                                                         |
| $a, b, c$ (Å)               | 10.1868(5)                                                           |
|                             | 10.3053(4)                                                           |
|                             | 18.3253(8)                                                           |
| $\alpha, \beta, \gamma$ (°) | 90                                                                   |
|                             | 90                                                                   |
|                             | 90                                                                   |
| Volume /Å <sup>3</sup>      | 1923.75(15)                                                          |
| $Z$                         | 4                                                                    |
| $R_1$ [ $I > 2\sigma(I)$ ]  | 0.0366                                                               |
| $wR_2$ [ $I > 2\sigma(I)$ ] | 0.0708                                                               |
| GOF                         | 0.965                                                                |
| Flack parameter             | -0.033(19)                                                           |

**Table S2.** Selected Cl–Sb bond lengths [Å] and Cl–Sb–Cl bond angles [°] for [R-HP]<sub>2</sub>SbCl<sub>6</sub> at 293K

| bond lengths [Å] |            | bond angles [°] |           |
|------------------|------------|-----------------|-----------|
| Sb1-Cl1          | 2.5001(15) | Cl1-Sb1-Cl3     | 174.73(5) |
| Sb1-Cl2          | 2.4500(16) | Cl1-Sb1-Cl5     | 91.12(5)  |
| Sb1-Cl3          | 2.8066(14) | Cl2-Sb1-Cl1     | 90.52(6)  |
| Sb1-Cl4          | 2.4024(15) | Cl2-Sb1-Cl3     | 91.43(5)  |
| Sb1-Cl5          | 2.9943(16) | Cl2-Sb1-Cl5     | 176.21(5) |
|                  |            | Cl3-Sb1-Cl5     | 86.64(4)  |
|                  |            | Cl4-Sb1-Cl1     | 89.19(6)  |
|                  |            | Cl4-Sb1-Cl2     | 90.72(6)  |
|                  |            | Cl4-Sb1-Cl3     | 85.89(5)  |
|                  |            | Cl4-Sb1-Cl5     | 85.88(5)  |

**Table S3.** Hydrogen bond lengths [Å] and angles [°] for [R-HP]<sub>2</sub>SbCl<sub>6</sub> at 293K

| D—H···A                    | D—H [Å] | H···A[Å] | D···A[Å] | D—H···A[°] |
|----------------------------|---------|----------|----------|------------|
| O2-H2···Cl5 <sup>I</sup>   | 0.820   | 2.403    | 3.191(4) | 161.47     |
| N2-H2A···Cl3 <sup>II</sup> | 0.890   | 2.355    | 3.204(4) | 159.46     |
| O1-H1···Cl4 <sup>I</sup>   | 0.820   | 2.656    | 3.441(6) | 160.68     |
| N1-H1B···Cl5               | 0.890   | 2.721    | 3.298(4) | 123.61     |

Symmetry code(s): (I) [x-1/2, -y+1/2, -z+2], (II) [x+1/2, -y+1/2, -z+2]

## References

- 1 G. Kresse and J. Furthmüller, *Phys. Rev. B*, 1996, **54**, 11169.
- 2 G. Kresse and J. Furthmüller, *Comput. Mater. Sci.*, 1996, **6**, 15-50.
- 3 J. P. Perdew, K. Burke and M. Ernzerhof, *Phys. Rev. Lett.*, 1996, **77**, 3865-3868.
